# Supplementary material for: Foam drainage study during plateau border mineralisation
Source: Royal Society of Chemistry journal article supplement (doi:10.1039/c1sm06778h), 2011-11-17
Supplement: c1sm06778h.pdf [file c1sm06778h.pdf]

## Supporting Information

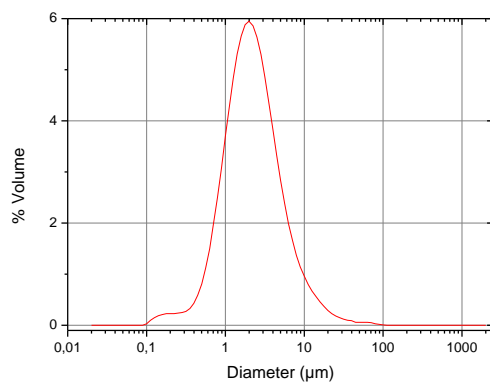

**Fig. 1** Size distribution of primary particles measured by static light scattering measurements performed at 25 °C with a Mastersizer 2000 Hydro SM device (Malvern) . The samples were diluted in the measuring cell (simple scattering conditions) and submitted to a rather intense agitation to ensure homogeneity.
